# Supplementary material for: Strategic approach of multifaceted antibacterial mechanism of limonene traced in Escherichia coli
Source: PubMed Central journal article supplement (PMC8257740; doi:10.1038/s41598-021-92843-3), 2021-07-05
Supplement: 41598_2021_92843_MOESM1_ESM.pdf [file 41598_2021_92843_MOESM1_ESM.pdf]

**Title:** Strategic approach of multifaceted antibacterial mechanism of limonene traced in *Escherichia coli*

**Running Title:** Antibacterial mechanism of Limonene

**Authors:** Akshi Gupta<sup>1</sup>, Ebenezer Jeyakumar<sup>2</sup> and Rubina Lawrence<sup>3\*</sup>

\* corresponding author

**Akshi Gupta<sup>1</sup>**

Department of Industrial Microbiology  
Jacob Institute of Biotechnology and Bioengineering  
Sam Higginbottom University of Agriculture, Technology and Sciences  
Prayagraj (Allahabad), Uttar Pradesh, India - 211007

Email: [akshi.gupta.88@gmail.com](mailto:akshi.gupta.88@gmail.com)

**Dr. Ebenezer Jeyakumar<sup>2</sup>**

Department of Industrial Microbiology  
Jacob Institute of Biotechnology and Bioengineering  
Sam Higginbottom University of Agriculture, Technology and Sciences  
Prayagraj (Allahabad), Uttar Pradesh, India - 211007

Email: [ebenezer.jeyakumar@gmail.com](mailto:ebenezer.jeyakumar@gmail.com)

Corresponding author:

**Prof. (Dr.) Rubina Lawrence<sup>3\*</sup>**

Department of Industrial Microbiology  
Jacob Institute of Biotechnology and Bioengineering  
Sam Higginbottom University of Agriculture, Technology and Sciences  
Prayagraj (Allahabad), Uttar Pradesh, India - 211007

Email: [rubinalawrence@gmail.com](mailto:rubinalawrence@gmail.com)

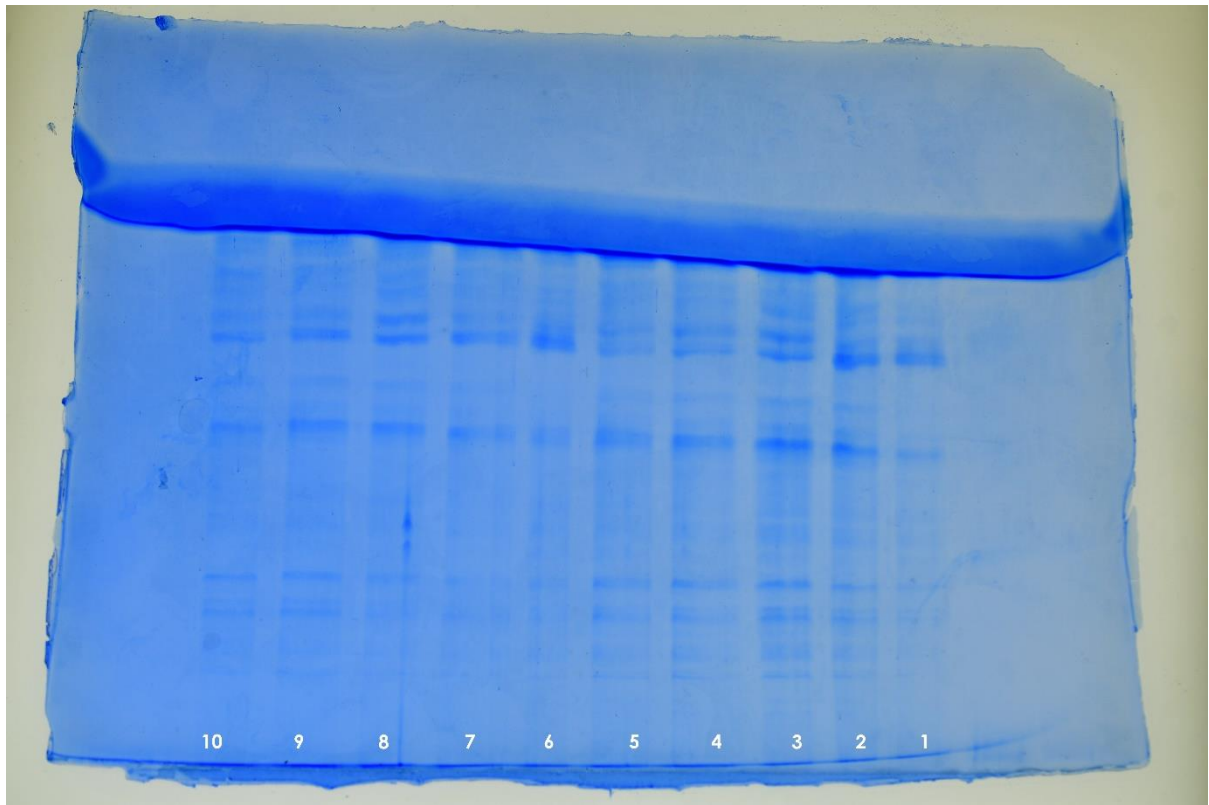

**Figure 6 original**

Fig 6: SDS-PAGE of proteins released from *Escherichia coli* into supernatant on treatment with limonene at 1X MIC and 2X MIC concentration

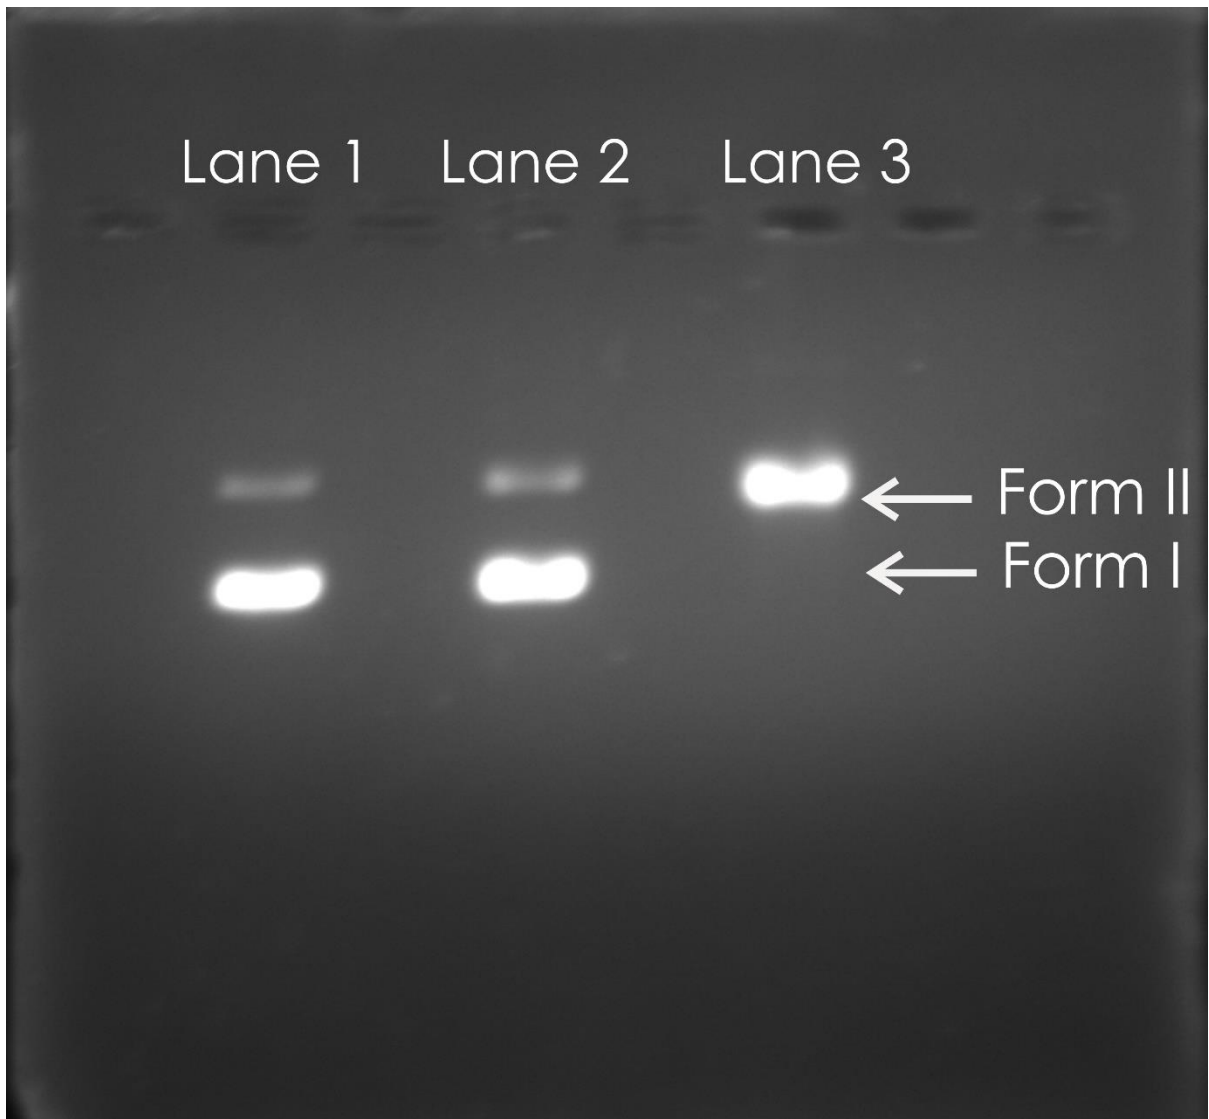

Figure 8 labelled

**Fig. 8. Modification of gel electrophoretic mobility of pUC19 plasmid DNA after treatment with Limonene. Lane 1- Negative control, Lane 2- Pure plasmid, Lane 3- Limonene (1X MIC)**

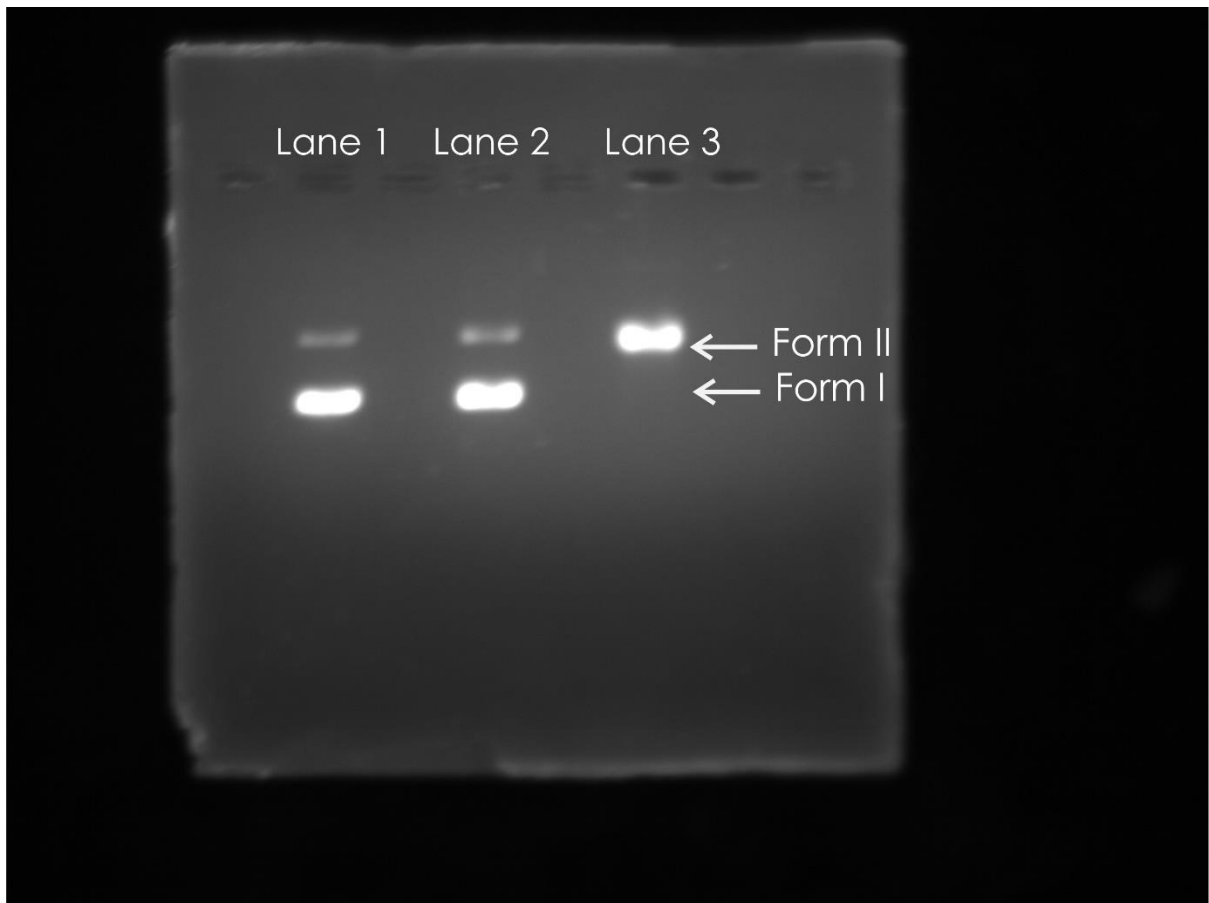

Figure 8 original

**Fig. 8. Modification of gel electrophoretic mobility of pUC19 plasmid DNA after treatment with Limonene. Lane 1- Negative control, Lane 2- Pure plasmid, Lane 3- Limonene (1X MIC)**

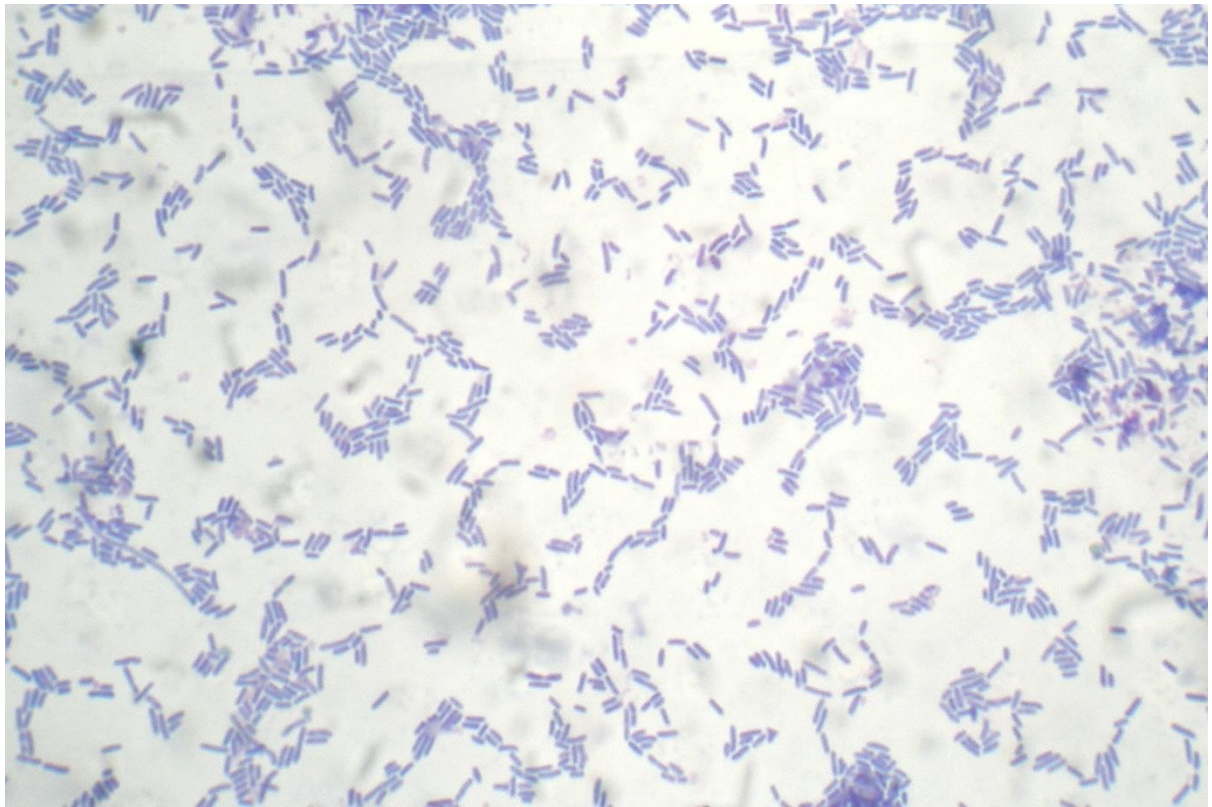

Figure 9a control untreated

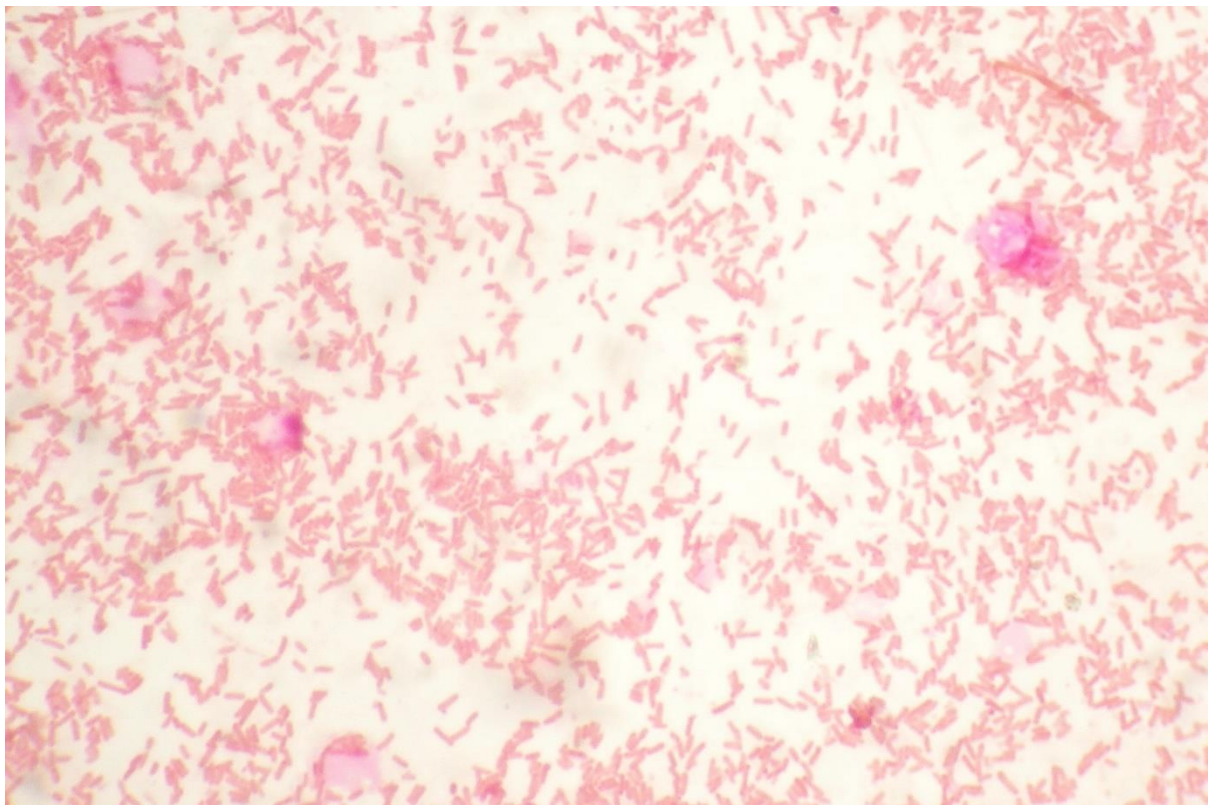

Figure 9b limonene treated



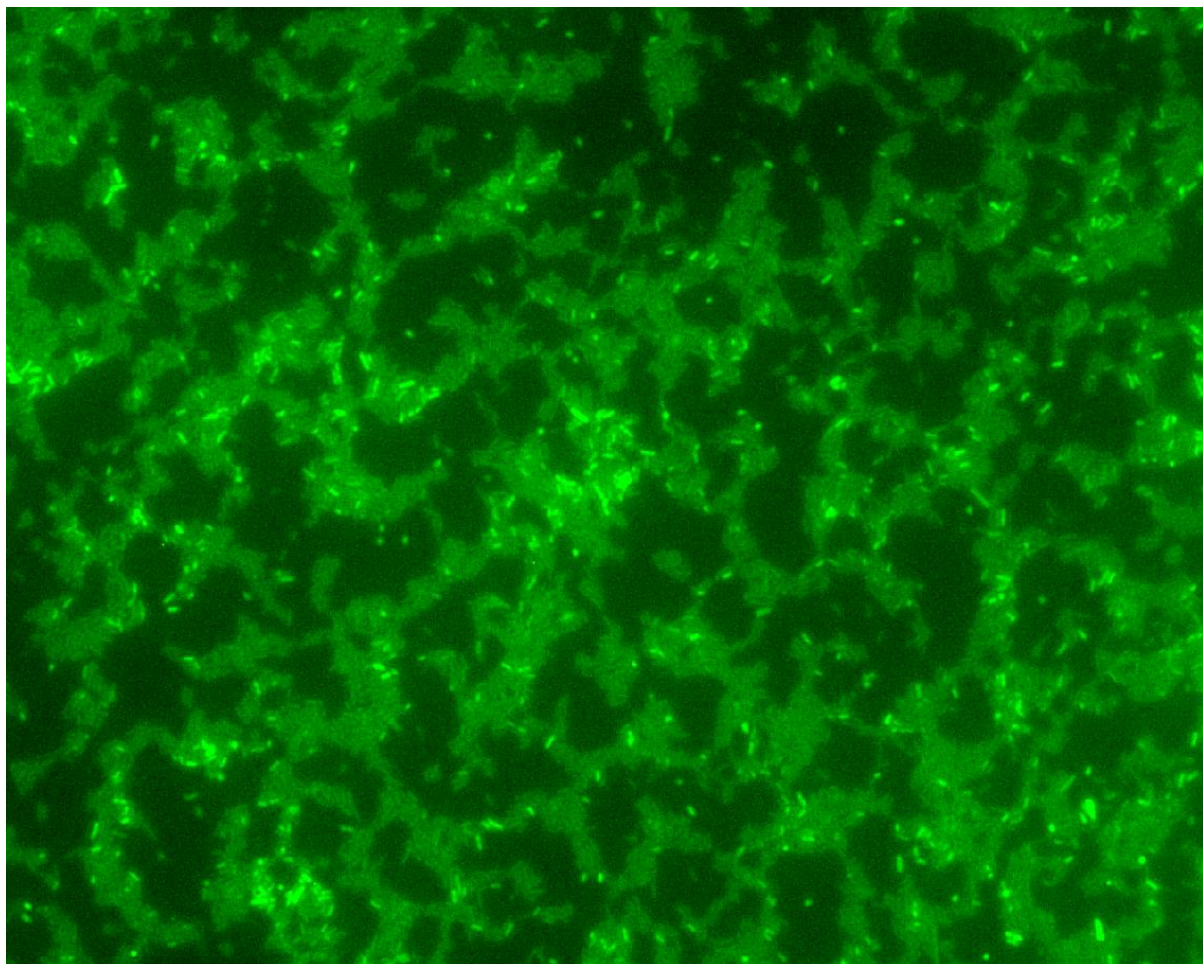

Figure 9c Untreated control

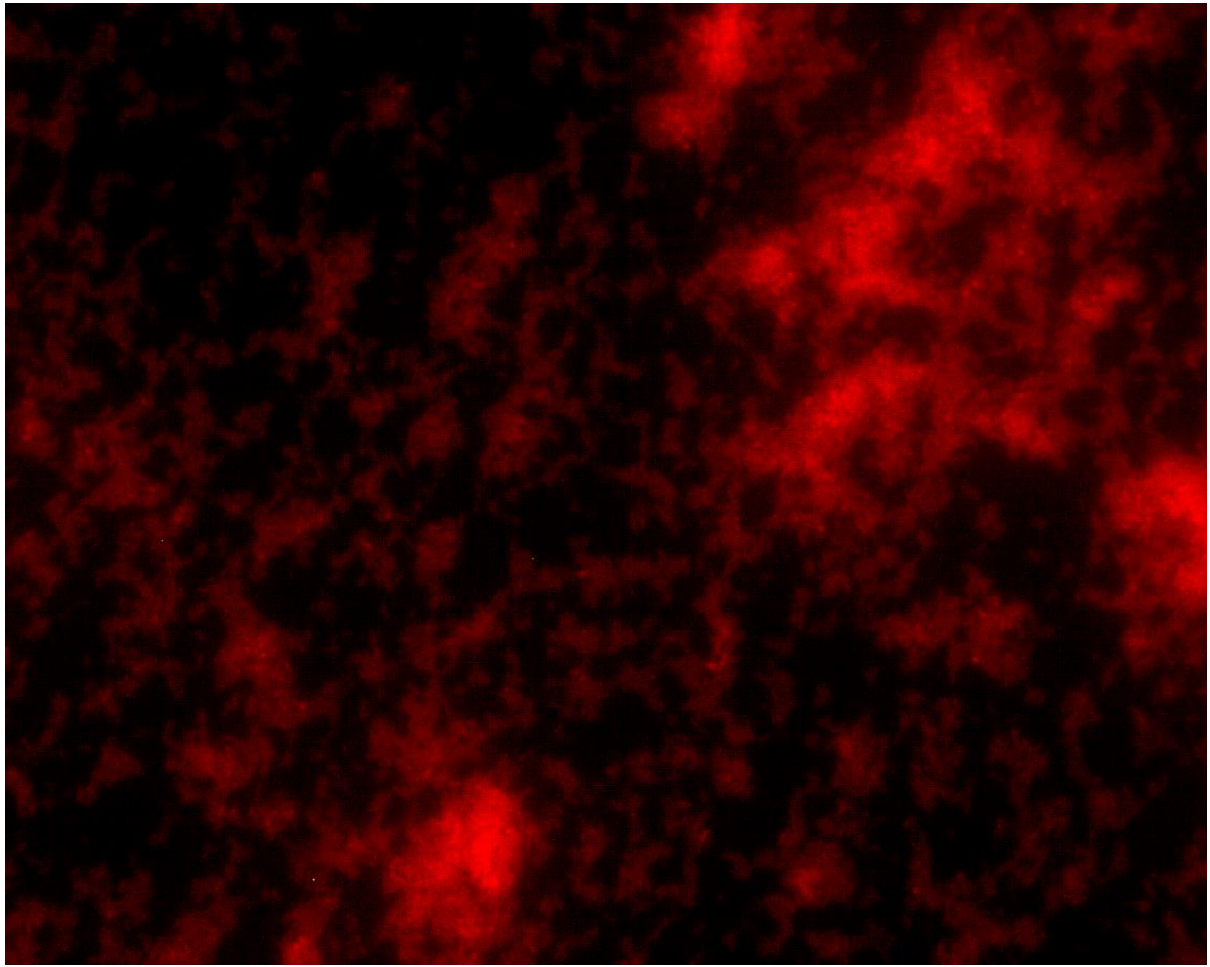

Figure 9d limonene Treated

Fig 9. Micrographs of untreated control and limonene treated (1XMIC) *E. coli* cells using Compound microscopy (a and b) fluorescent microscopy (c and d)
